# Supplementary material
Source: publisher figshare collection journal article supplement (https://acs.figshare.com/ndownloader/files/28660244)
Supplement: Supplementary file 1 [file 28660244]

# Supporting Information

## **Ag size/structure-dependent effect on low-temperature selective catalytic oxidation of NH<sub>3</sub> over Ag/MnO<sub>2</sub>**

Haifeng Wang<sup>1</sup>, Mingyue Lin<sup>2,3</sup>, Toru Murayama<sup>2,3,4\*</sup>, Shixiang Feng<sup>1</sup>, Masatake Haruta<sup>2</sup>, Hiroki Miura<sup>1,3,5</sup>, Tetsuya Shishido<sup>1,2,3,5\*</sup>

<sup>1</sup>Department of Applied Chemistry for Environment, Graduate School of Urban Environmental Sciences, Tokyo Metropolitan University, 1-1 Minami-Osawa, Hachioji, Tokyo 192-0397, Japan

<sup>2</sup>Research Center for Gold Chemistry, Tokyo Metropolitan University, Tokyo, 192-0397, Japan

<sup>3</sup>Research Center for Hydrogen Energy-based Society, Tokyo Metropolitan University, Tokyo 192-0397, Japan

<sup>4</sup>Yantai Key Laboratory of Gold Catalysis and Engineering, Shandong Applied Research Center of Gold Nanotechnology (Au-SDARC), School of Chemistry & Chemical Engineering, Yantai University, Yantai 264005, China

<sup>5</sup>Elements Strategy Initiative for Catalysts & Batteries, Kyoto University, Kyoto, 615-8520, Japan

Corresponding Authors

Email for Tetsuya Shishido: shishido-tetsuya@tmu.ac.jp

Email for Toru Murayama: murayama@tmu.ac.jp

**This PDF file includes:**

1. Supplementary methods

1.1. Catalyst preparation

1.2. Catalyst characterizations

1.3. NH<sub>3</sub>-SCO reaction test

1.4. Kinetic measurements

1.5. Verification of the absence of mass transfer limitations (Weisz – Prater Criterion).

Table S1. Weisz – Prater Criterion values at various temperatures.

Table S2. Parameters used for Weisz – Prater criteria.

2. Supplementary Discussion

2.1. Supplementary information on Ag/MnO<sub>2</sub> catalysts

Fig. S1. TEM images of Ag/MnO<sub>2</sub>-*X* catalysts.

Fig. S2. Particle size distributions and height distributions of Ag/MnO<sub>2</sub>-*X* catalysts.

Fig. S3. The cross-sectional views of model structures of MnO<sub>2</sub> and Ag/MnO<sub>2</sub>-500 catalysts.

Fig. S4. White-line intensity of Ag K-edge XANES spectra of Ag/MnO<sub>2</sub>-*X* catalysts at 25530 eV. For Ag foil, the intensity is 0.98566.

Fig. S5. The influence of H<sub>2</sub>O on catalytic performance over the Ag/MnO<sub>2</sub>-400 catalyst.

Fig. S6. Stability test over the Ag/MnO<sub>2</sub>-400 catalyst at 40 and 125 °C.

Fig. S7. NH<sub>3</sub>-TPD profiles of Ag/MnO<sub>2</sub>-*X* catalysts.

Fig. S8. O<sub>2</sub>-TPD profiles of Ag/MnO<sub>2</sub>-*X* catalysts.

Fig. S9. H<sub>2</sub>-TPR profiles of Ag/MnO<sub>2</sub>-*X* catalysts.

Fig. S10. N<sub>2</sub> adsorption and desorption isotherms and pore size distributions of Ag/MnO<sub>2</sub>-*X* catalysts.

Fig. S11. *In-situ* NH<sub>3</sub> DRIFTS results of Ag/MnO<sub>2</sub>-400 catalyst at various temperatures.

Fig. S12. Catalytic oxidation activity tests over Ag/MnO<sub>2</sub>-400 catalysts with different flow rates.

Fig. S13. N<sub>2</sub>O and NO selectivities over Ag/MnO<sub>2</sub>-400 catalysts at 80 °C.

Table S3. Overview of literature data of catalytic performance related to Ag based

catalysts

Table S4. Results for calculations of surface number and density of Ag NPs.

Table S5. Physicochemical properties of Ag/MnO<sub>2</sub>-*X* catalysts.

2.2. Supplementary catalytic reaction and characterization of Ag/MnO<sub>2</sub> with different Ag loadings

Fig. S14. NH<sub>3</sub>-SCO catalytic performance over yAg/MnO<sub>2</sub>-400 catalysts.

Fig. S15. TEM images of yAg/MnO<sub>2</sub>-400 catalysts.

Fig. S16. Ag K-edge XANES spectra, *k*<sup>3</sup>-weighted EXAFS oscillation, and their Fourier transforms of yAg/MnO<sub>2</sub>-400 catalysts and references.

Fig. S17. White-line intensity of Ag K-edge XANES spectra of yAg/MnO<sub>2</sub>-400 catalysts at 25530 eV. For Ag foil, the intensity is 0.98566.

Table S6. Structural parameters of yAg/MnO<sub>2</sub>-400.

3. Supplementary References

## 1. Supplementary Methods

### 1.1 Catalyst preparation

Ag/MnO<sub>2</sub> catalysts were prepared by a multi-step process. Firstly, rod-shaped MnO<sub>2</sub> was synthesized by a hydrothermal method. In detail, 2.484 g MnSO<sub>4</sub>·H<sub>2</sub>O and 1.659 g KMnO<sub>4</sub> were dissolved in 75 mL deionized water and then put into a 100 mL Teflon-lined stainless steel autoclave that was sealed and maintained at 160 °C for 24 h. The resulting black slurry was filtered, washed with 2 L deionized water, and then dried at 120 °C for 24 h, followed by calcination at 500 °C in a furnace for 6 h at a ramp of 5 °C/min for further use. Secondly, 2.0 g MnO<sub>2</sub> was weighed and added to 100 mL H<sub>2</sub>O and stirred in an ice bath for 1 h. Then 0.315 g AgNO<sub>3</sub> was initially dissolved in 20 mL deionized water to form a transparent solution, to which 0.3 mL 25 wt% ammonia solution was added dropwise with stirring, resulting in another transparent [Ag(NH<sub>3</sub>)<sub>2</sub>]OH solution. Subsequently, both the [Ag(NH<sub>3</sub>)<sub>2</sub>]OH solution and an H<sub>2</sub>O<sub>2</sub> solution (30 wt.%, 30 mL) were added simultaneously and drop by drop to an MnO<sub>2</sub> suspension and stirred at 0°C for 3 h. After that, the final suspension was filtered, washed with 500 mL distilled water, and then dried at 80 °C for 24 h to obtain the Ag/MnO<sub>2</sub>-80 precursor. Then Ag/MnO<sub>2</sub>-80 was calcined at 200, 300, 400 and 500 °C for 6 h at a ramp of 5 °C/min in a furnace to obtain Ag/MnO<sub>2</sub>-200, Ag/MnO<sub>2</sub>-300, Ag/MnO<sub>2</sub>-400 and Ag/MnO<sub>2</sub>-500 samples, respectively. Note that the Ag loading was set as 10 wt% unless otherwise stated. These catalysts were referred to as Ag/MnO<sub>2</sub>-X (where X indicates calcination temperatures of 200, 300, 400 and 500°C, respectively).

Other catalysts with 5 wt%, 20 wt% and 30 wt% Ag loadings and calcination at 400 °C were also synthesized for investigation of the effect of Ag loadings. They were referred to as yAg/MnO<sub>2</sub>-400 (where y indicates the Ag loading)

### 1.2 Catalyst characterizations

#### 1.2.1 Atomic absorption spectra

Atomic absorption spectra (AAS) was obtained by using a Shimadzu AA-6200 to estimate the actual loading amount of Ag on the surface of Ag/MnO<sub>2</sub>-X catalysts. Prior

to the measurement, ~20 mg sample was dissolved in newly prepared 0.5 mol/L HNO<sub>3</sub> solution for 10 min with shaking, and then the solution was adjusted with distilled water to 20 mL for measurement. Standard Ag solutions of 1.094 mg/L, 2.1875 mg/L, 4.375 mg/L, 8.75 mg/L and 17.5 mg/L were used for the creation of a calibration curve.

#### 1.2.2 Transmission electron microscopy

The morphology, mean size and height of Ag nanoparticles were investigated by high-resolution transmission electron microscopy (JEOL, JEM-3200FS) at 300 kV. Samples were deposited on a carbon film-coated mesh copper grid. At least 150 particles were measured in different areas to determine the mean particle diameter and size distribution of each sample.

#### 1.2.3 Powder X-ray diffraction

Powder X-ray diffraction (XRD) patterns of the samples were collected on a Rigaku Smartlab with Cu- K $\alpha$  radiation ( $\lambda = 1.5418 \text{ \AA}$ ). XRD data were taken over the 2 theta range from 10° to 80° at a scan rate of 2° min<sup>-1</sup>.

#### 1.2.4 XAFS

Ag K-edge XAFS measurements were performed at the BL01B1 beamline at SPring-8 (Hyogo, Japan) operated at 8 GeV using a Si (311) two-crystal monochromator. XAFS spectra were obtained at room temperature. XAFS data were processed to isolate EXAFS spectra from the background using Athena software. Replicate scans were averaged to increase the signal-to-noise ratios. The resulting EXAFS spectra (*k* space) were Fourier-transformed and fitted in R space using Artemis software.

#### 1.2.5 NH<sub>3</sub>-TPD

The acid properties of supports were measured by temperature-programmed desorption of ammonia (NH<sub>3</sub>-TPD) using a Belcat system equipped with a mass spectrometer detector (BEL Japan). Prior to the measurement, the sample (ca. 50 mg) was preheated under helium (50 mL/min) at 200 °C for 1 h (at 80 °C for the Ag/MnO<sub>2</sub>-80 catalyst). Then 5% NH<sub>3</sub>/He was introduced at 25 °C for 30 min. Finally, the NH<sub>3</sub> desorption profile from 25 °C to 700 °C was recorded with a mass spectrometer under 30 mL/min He flow.

### 1.2.6 O<sub>2</sub>-TPD

Temperature-programmed desorption of oxygen (O<sub>2</sub>-TPD) was carried out using a Belcat system equipped with a mass spectrometer detector (BEL Japan). Prior to the measurement, the sample (ca. 30 mg) was preheated under helium (50 mL/min) at 200 °C for 1 h (at 80 °C for the Ag/MnO<sub>2</sub>-80 catalyst). Then 30 mL/min 5% O<sub>2</sub>/He was introduced at 100 °C for 30 min. Finally, the O<sub>2</sub> desorption profile from 100 °C to 800 °C (700 °C for the MnO<sub>2</sub> support) was recorded with a mass spectrometer under 30 mL/min He flow.

### 1.2.7 H<sub>2</sub>-TPR

Temperature-programmed reduction of hydrogen (H<sub>2</sub>-TPR) was carried out using a Belcat system equipped with a mass spectrometer detector (BEL Japan). Prior to the measurement, the sample (ca. 40 mg) was pretreated under 5% O<sub>2</sub> (50 mL/min) at 200 °C for 1 h (at 80 °C for the Ag/MnO<sub>2</sub>-80 catalyst). Then the H<sub>2</sub> reduction profile was recorded with a mass spectrometer in 50 mL/min 5% H<sub>2</sub>/Ar flow from 40 °C to 600 °C

### 1.2.8 N<sub>2</sub> adsorption and desorption

The specific surface area and pore size distribution of Ag-based catalysts were determined from N<sub>2</sub> adsorption isotherms at -196 °C on BELSORP. The analyzed samples were outgassed at 300 °C for 3 h prior to the measurement.

## 1.3 NH<sub>3</sub>-SCO reaction test

The catalysts were tested for NH<sub>3</sub>-SCO reaction in a fixed-bed flow reactor (7.9 mm in diameter) using the Belcat II system under atmospheric pressure. The sample weight was set as 150 mg unless otherwise state. The composition of the gas mixture at the reactor inlet was NH<sub>3</sub> (100 ppm, 50 mL/min), O<sub>2</sub> (20 mL/min), and balance Ar (30 mL/min). The total flow rate of the reaction mixture was 100 mL/min with a space velocity (SV) of 40000 mL h<sup>-1</sup>g<sup>-1</sup>. The outlet gas compositions were analyzed with an online FTIR spectrometer (JASCO, FT-IR4700) equipped with a DTGS detector. The parameters used for calculations of conversion and selectivity were selected at the

steady state to exclude the influence of physically adsorbed NH<sub>3</sub> on the support.

NH<sub>3</sub> conversion and the selectivities to N<sub>2</sub>, N<sub>2</sub>O and NO were calculated using the following equations S1-S4:

$$\text{NH}_3 \text{ conversion (\%)} = \frac{\text{NH}_{3(\text{in})} - \text{NH}_{3(\text{out})}}{\text{NH}_{3(\text{in})}} \times 100\% \quad (\text{S1})$$

$$\text{N}_2 \text{ selectivity (\%)} = \frac{\text{NH}_{3(\text{in})} - \text{NH}_{3(\text{out})} - \text{NO}_{(\text{out})} - \text{NO}_{2(\text{out})} - 2\text{N}_2\text{O}_{(\text{out})}}{\text{NH}_{3(\text{in})} - \text{NH}_{3(\text{out})}} \times 100\% \quad (\text{S2})$$

$$\text{N}_2\text{O selectivity (\%)} = \frac{2\text{N}_2\text{O}_{(\text{out})}}{\text{NH}_{3(\text{in})} - \text{NH}_{3(\text{out})}} \times 100\% \quad (\text{S3})$$

$$\text{NO selectivity (\%)} = \frac{\text{NO}_{(\text{out})}}{\text{NH}_{3(\text{in})} - \text{NH}_{3(\text{out})}} \times 100\% \quad (\text{S4})$$

## 1.4 Kinetic measurements

### Apparent activation energy

The calculation of apparent activation energy was based on linear-fitting data in Arrhenius plots with catalytic activity below 20% NH<sub>3</sub> conversion.

### Reaction order

A catalyst of 150 mg was used for the study of reaction order. When O<sub>2</sub> reaction order was measured, the reaction temperature was set at 60 °C. The concentration of NH<sub>3</sub> was kept constant at 50 ppm balanced with Ar. The O<sub>2</sub> concentration was varied from 5% to 20% (5%, 10%, 15% and 20%). When NH<sub>3</sub> reaction order was measured, the reaction temperature was set at 70 °C. The concentration of O<sub>2</sub> was kept constant at 20% while the NH<sub>3</sub> concentration was varied from 50 ppm to 100 ppm (50, 60, 70, 80, 90 and 100 ppm).

## 1.5 Verification of the absence of internal diffusion limitations.

Weisz – Prater Criterion (C<sub>WP</sub>):<sup>1</sup>

$$C_{WP} = \frac{\text{Reaction rate}}{\text{Diffusion rate}} = \frac{-r'_{A(\text{meas})}\rho_c R^2}{D_e C_{As}} < 0.3 \quad (\text{S5})$$

Where  $r'_{A(\text{meas})}$  is the measured reaction rate (mol/g • s),  $\rho_c$  is the catalyst packing

density ( $\text{g/cm}^3$ ),  $R$  is the catalyst particle radius (cm),  $D_e$  is the gas phase diffusivity ( $\text{cm}^2/\text{s}$ ) and  $C_{As}$  is the ammonia concentration at the catalyst surface ( $\text{mol/cm}^3$ ).

The values of Weisz – Prater Criterion ( $C_{WP}$ ) over the Ag/MnO<sub>2</sub>-400 catalyst at various temperatures were calculated, and the results are shown in Table S1. The calculated values are far less than 0.3, indicating that mass transfer limitations can be ignored in this work.

Table S1. Weisz – Prater Criterion ( $C_{WP}$ ) values at various temperatures

| Temp.<br>(°C) | $r'_{A(meas)}$<br>(mol/g· s) | $D_e$<br>( $\text{cm}^2/\text{s}$ ) | $C_{As}$<br>(mol/ $\text{cm}^3$ ) | Weisz-Prater<br>criterion |
|---------------|------------------------------|-------------------------------------|-----------------------------------|---------------------------|
| 35            | 2.2E-09                      | 45794.96                            | 1.98E-09                          | 0.00005                   |
| 40            | 2.7E-09                      | 46914.61                            | 1.95E-09                          | 0.00006                   |
| 45            | 2.8E-09                      | 48043.24                            | 1.92E-09                          | 0.00007                   |
| 50            | 3.9E-09                      | 49180.78                            | 1.89E-09                          | 0.00009                   |
| 55            | 5.2E-09                      | 50327.16                            | 1.86E-09                          | 0.00013                   |
| 60            | 7.1E-09                      | 51482.31                            | 1.83E-09                          | 0.00017                   |
| 70            | 8.7E-09                      | 53818.65                            | 1.78E-09                          | 0.00021                   |
| 75            | 1.3E-08                      | 54999.72                            | 1.75E-09                          | 0.00033                   |
| 80            | 1.8E-08                      | 56189.31                            | 1.73E-09                          | 0.00044                   |
| 85            | 2.2E-08                      | 57387.35                            | 1.70E-09                          | 0.00054                   |
| 90            | 2.3E-08                      | 58593.79                            | 1.68E-09                          | 0.00058                   |
| 100           | 2.3E-08                      | 61031.62                            | 1.63E-09                          | 0.00058                   |
| 110           | 2.3E-08                      | 63502.35                            | 1.59E-09                          | 0.00059                   |
| 120           | 2.3E-08                      | 66005.55                            | 1.55E-09                          | 0.00060                   |



The detailed calculation steps and parameters are shown below:

Table S2. Parameters used for Weisz – Prater criteria

|                                                                                         |                                                                                                                                                                                                              |
|-----------------------------------------------------------------------------------------|--------------------------------------------------------------------------------------------------------------------------------------------------------------------------------------------------------------|
| Observed reaction rate<br>$r'_{A(meas)}$                                                | $NH_3 \text{ conversion} \times \frac{NH_3 \text{ flow rate } (\frac{mol}{s})}{Amount \text{ of catalyst}(g)}$<br>$= NH_3 \text{ conversion} \times [2.28 \times 10^{-2} \text{ mol g}^{-1} \text{ s}^{-1}]$ |
| $NH_3$ concentration at the catalyst surface (as a function of temperature)<br>$C_{As}$ | $\frac{N_{NH_3}}{V} [\text{mol cm}^{-3}] = \frac{1}{T} [2.45 \times 10^{-3} \text{ K} \cdot \text{mol cm}^{-3}]$                                                                                             |
| Catalyst packing density<br>$\rho_c$                                                    | 0.1 [g cm <sup>-3</sup> ]                                                                                                                                                                                    |
| Catalyst particle radius<br>$R$                                                         | 0.002 [cm]                                                                                                                                                                                                   |

The diffusivity ( $D_e$ ) can be calculated as follows

$$D_e = \frac{1}{1/D_b + 1/D_{Kn}} \quad (S6)$$

where  $D_b$  is the bulk diffusivity and  $D_{Kn}$  is the Knudsen diffusivity.

The bulk diffusivity ( $D_b$ ) is given by:

$$D_b = \frac{\bar{v}\lambda_g}{3} \quad (S7)$$

Where  $\lambda_g$  is the mean free path in the gas phase,  $\bar{v}$  is the mean velocity.

The Knudsen diffusivity ( $D_{Kn}$ ) is given by:

$$D_{Kn} = \bar{v} \frac{d_p}{3} \quad (S8)$$

Where  $d_p$  is the pore diameter of the catalyst (4.3 nm).

The mean free path in the gas phase is calculated by:

$$\lambda_g = \frac{1}{\sqrt{2}\pi\sigma^2(N_{NH_3}/V)} = \frac{RT}{\sqrt{2}\pi\sigma^2 P_{NH_3}} \quad (S9)$$

where  $\sigma$  is the molecular diameter of  $NH_3$  ( $2.90 \times 10^{-8} \text{ cm}$ ), <sup>2</sup>  $R$  is the universal gas constant ( $82.057 * \frac{atm \cdot cm^3}{K \cdot mol}$ ),  $P_{NH_3}$  is the  $NH_3$  partial pressure ( $5.07 \times 10^{-6} \text{ mol\%}$ ). Thus,

the mean free path as a function of temperature becomes:

$$\lambda_g = \frac{RT}{\sqrt{2}\pi\sigma^2 P_{NH_3}} = (7.288 \times 10^{-4}) * T \frac{cm}{K} \quad (S10)$$

For example, the mean free path at a reaction temperature of 50 °C is 0.236 cm (or  $2.355 \times 10^6$  nm), which is far greater than the pore diameter (4.3 nm) of the catalysts. Hence, pore diffusion is dominated by Knudsen diffusion.

$$D_e \cong D_{Kn} \quad (S11)$$

The mean velocity for the NH<sub>3</sub> molecule is given by:

$$\bar{v} = \left( \frac{8k_B T}{\pi m} \right)^{1/2} \quad (S12)$$

Where  $k_B$  is the Boltzmann's constant ( $1.381 \times 10^{-16}$  g cm<sup>2</sup> s<sup>-2</sup> K<sup>-1</sup>) and m is the mass of NH<sub>3</sub> (17 amu =  $2.824 \times 10^{-23}$  g). Hence, the mean velocity for the NH<sub>3</sub> molecule as a function of temperature

$$\bar{v} = 1.2459 \times 10^7 T^{1/2} \frac{cm}{s \cdot K^{1/2}} \quad (S13)$$

Therefore, the effective diffusivity becomes:

$$D_e = 1.7443 \times 10^7 T^{1/2} \frac{cm^2}{s \cdot K^{1/2}} \quad (S14)$$

## 2. Supplementary Discussion

### 2.1. Supplementary information on Ag/MnO<sub>2</sub> catalysts

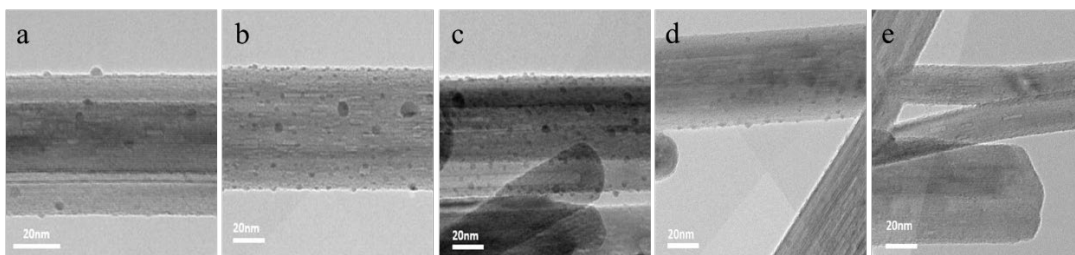

Fig. S1. TEM images of Ag/MnO<sub>2</sub>-*X* catalysts: (a) Ag/MnO<sub>2</sub>-80, (b) Ag/MnO<sub>2</sub>-200, (c) Ag/MnO<sub>2</sub>-300, (d) Ag/MnO<sub>2</sub>-400, and (e) Ag/MnO<sub>2</sub>-500.

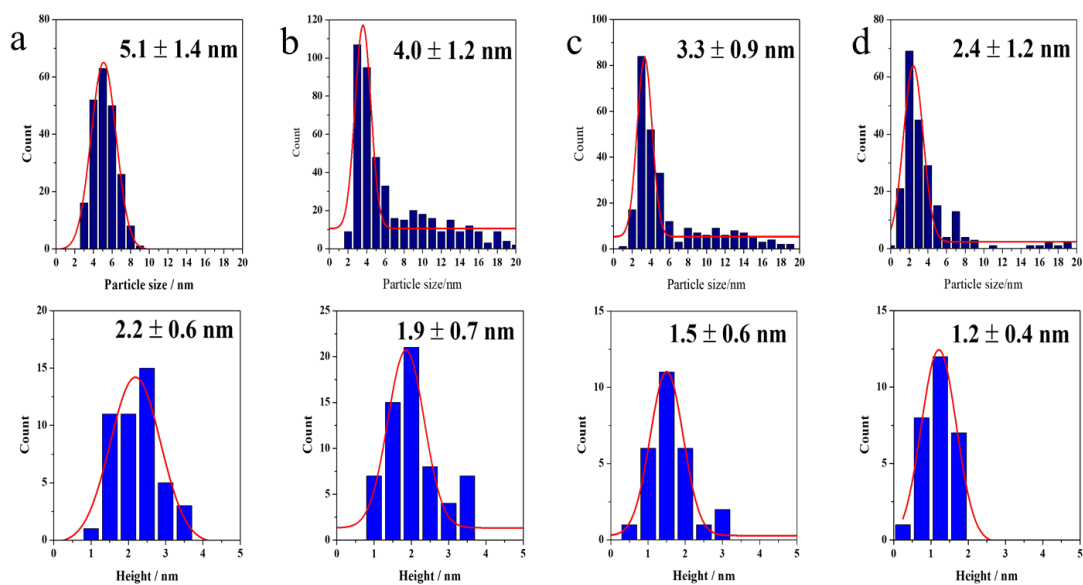

Fig. S2. Particle size distributions (upper) and height distributions (lower) of Ag/MnO<sub>2</sub>-*X* catalysts: (a) Ag/MnO<sub>2</sub>-80, (b) Ag/MnO<sub>2</sub>-200, (c) Ag/MnO<sub>2</sub>-300, and (d) Ag/MnO<sub>2</sub>-400.

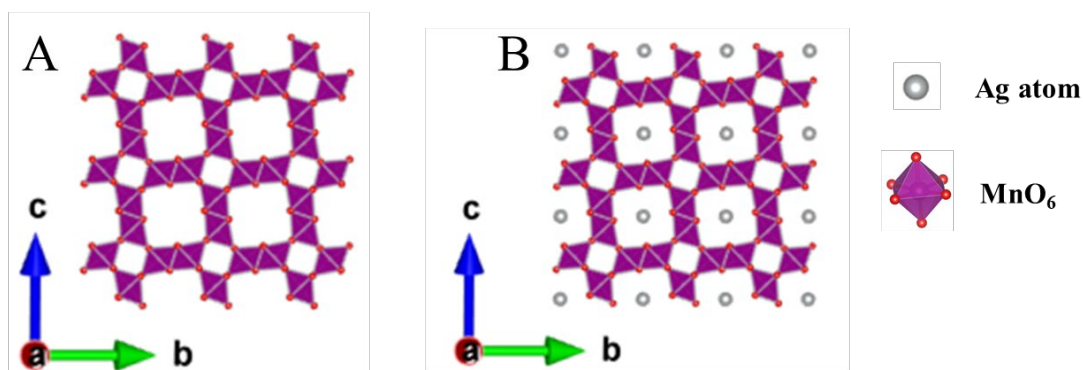

Fig. S3. The cross-sectional views of model structures of  $\text{MnO}_2$  and  $\text{Ag/MnO}_2$ -500 catalysts.

Rod-shaped  $\text{MnO}_2$  with a width of about 80 nm can be clearly seen in Fig. S1 regardless of the calcination temperature from 80 °C to 500 °C, suggesting that the calcination process after Ag deposition did not change the morphology of the  $\text{MnO}_2$  support, and the rod morphology of the  $\text{MnO}_2$  support remained for all of the catalysts tested.

The Ag NPs with a narrow size distribution were deposited on the rod-shaped  $\text{MnO}_2$  in  $\text{Ag/MnO}_2$ - $X$  catalysts (Fig. S2). The size of the Ag NPs on  $\text{MnO}_2$  that was dried at 80 °C was about 5.1 nm, and no obvious larger aggregates were found over  $\text{Ag/MnO}_2$ -80. In addition, the Ag NPs gradually became smaller with increase in the calcination temperature up to 400 °C. Atomically dispersed Ag might be formed at a temperature of 500 °C, at which no obvious Ag NPs were observed by HR-TEM, being consistent with previous reports. The average heights of Ag nanoparticles over various catalysts were also measured (Fig. S2). The average height gradually decreased from 2.2 nm (for  $\text{Ag/MnO}_2$ -80) to 1.2 nm (for  $\text{Ag/MnO}_2$ -400) with increase in the calcination temperature up to 400 °C. The height can't be measured over  $\text{Ag/MnO}_2$ -500 catalyst because atomically dispersed Ag atoms formed in/on the channel structure of  $\text{MnO}_2$  support.

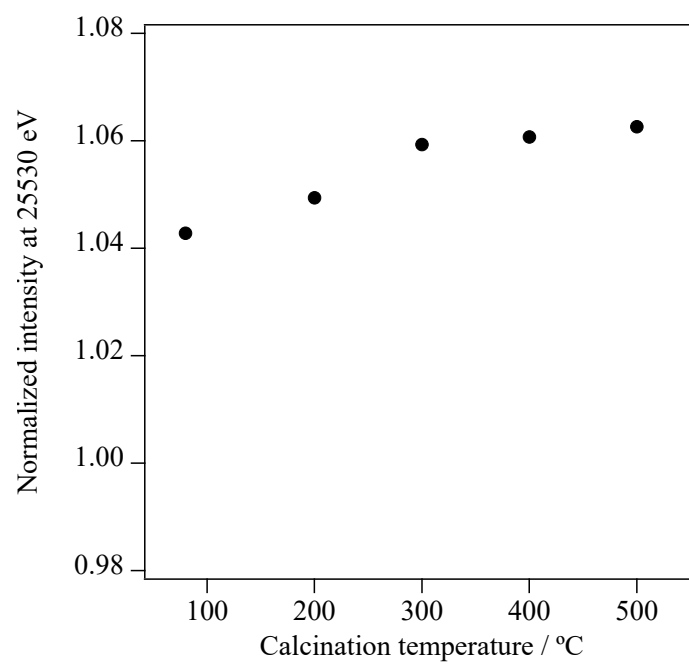

Fig. S4. White-line intensity of Ag K-edge XANES spectra of Ag/MnO<sub>2</sub>-*X* catalysts at 25530 eV. For Ag foil, the intensity is 0.98566.

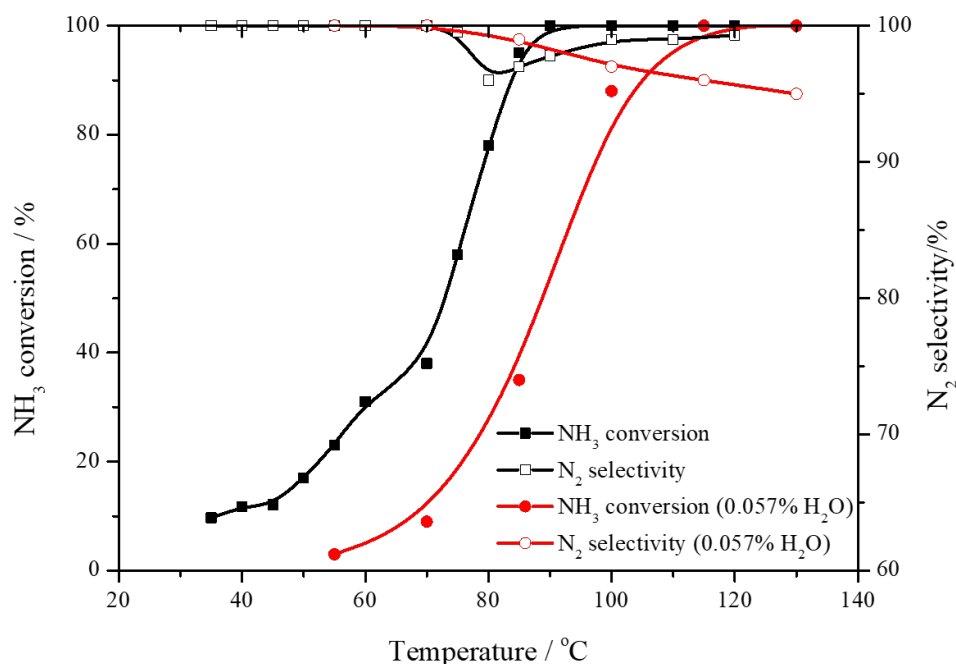

Fig. S5. The influence of H<sub>2</sub>O on NH<sub>3</sub>-SCO over the Ag/MnO<sub>2</sub>-400 catalyst in the presence/absence of H<sub>2</sub>O in reaction gas as a function of temperature. H<sub>2</sub>O concentration: 0.057 %; 50 ppm NH<sub>3</sub>; 20% O<sub>2</sub>; 100 mL/min.

Fig. S5 shows the influence of H<sub>2</sub>O on NH<sub>3</sub>-SCO catalytic performance over Ag/MnO<sub>2</sub>-400 catalyst. As it can be seen, NH<sub>3</sub> oxidation activity decreased with the presence of 0.057% H<sub>2</sub>O in the inlet reaction gas. The temperature of 100% NH<sub>3</sub> conversion increased by around 25 °C after the introduction of H<sub>2</sub>O. Besides, N<sub>2</sub> selectivity slightly decreased from 99% to 96% in the presence of H<sub>2</sub>O at 115 °C. These results indicated that H<sub>2</sub>O might adsorb on the catalyst surface and block the active sites for NH<sub>3</sub> oxidation but only has a little effect on N<sub>2</sub> selectivity over Ag/MnO<sub>2</sub>-400 catalyst.

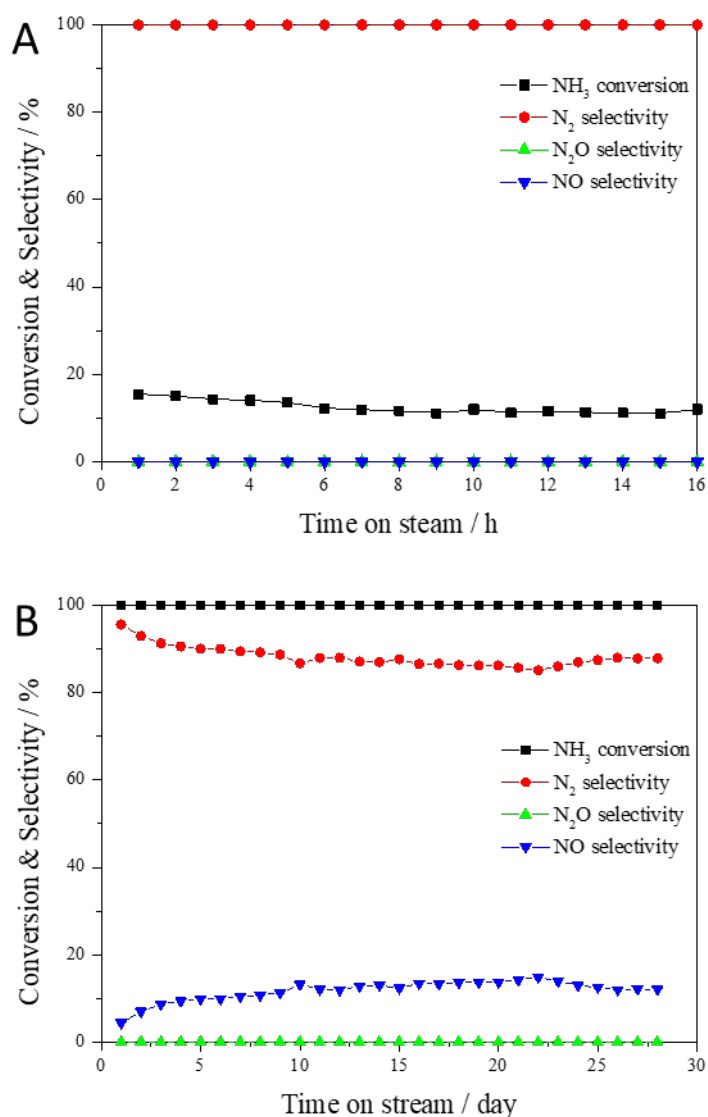

Fig. S6. Stability test over the Ag/MnO<sub>2</sub>-400 catalyst at 40 °C (A) and 125 °C (B)

Stability tests over Ag/MnO<sub>2</sub>-400 at 40 °C and 125 °C were carried out. As shown in Fig. S6, it was found that NH<sub>3</sub> conversion initially was 15% at 40 °C and remained at 12%-15% for 16 hours without obvious decrease in NH<sub>3</sub> conversion. Moreover, no N<sub>2</sub>O and NO were formed during the stability test, N<sub>2</sub> selectivity remained at 100% all the time. Besides, as shown in Fig. S6B, it was found that NH<sub>3</sub> conversion reached 100% at 125 °C and remained at that conversion for near one month. Meanwhile, N<sub>2</sub> selectivity kept at around 90% for about 20 days.

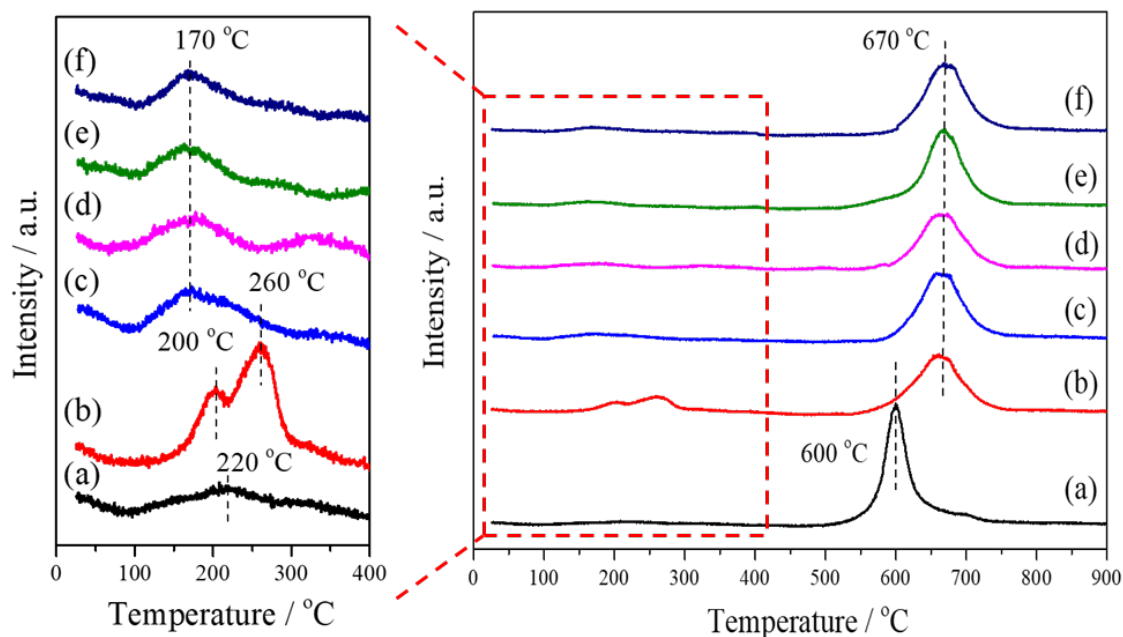

Fig. S7.  $\text{NH}_3$ -TPD profiles of  $\text{Ag}/\text{MnO}_2\text{-}X$  catalysts: (a)  $\text{MnO}_2$ , (b)  $\text{Ag}/\text{MnO}_2\text{-}80$ , (c)  $\text{Ag}/\text{MnO}_2\text{-}200$ , (d)  $\text{Ag}/\text{MnO}_2\text{-}300$ , (e)  $\text{Ag}/\text{MnO}_2\text{-}400$  and (f)  $\text{Ag}/\text{MnO}_2\text{-}500$ .

The acidity properties of the strength and amount of acid sites of the catalysts and supports were studied by  $\text{NH}_3$ -TPD measurements, and the results are shown in Fig. S7. Obvious desorption peaks appeared at temperatures of 500-700 °C. The temperature of  $\text{NH}_3$  desorption on  $\text{MnO}_2$  appeared at 600 °C, and the desorption peak shifted to 670 °C after Ag deposition for  $\text{Ag}/\text{MnO}_2\text{-}X$  catalysts regardless of the calcination temperature, indicating that the Ag NPs were mainly located at strong Lewis acid sites, thereby forming stronger acid sites, possibly around the periphery over  $\text{Ag}/\text{MnO}_2\text{-}X$ . At temperatures lower than 400 °C, as shown in the magnification inset, one small  $\text{NH}_3$  desorption peak over  $\text{MnO}_2$  appeared at 220 °C, and the peak shifted to a lower position than  $\text{MnO}_2$ , indicating that a few weak acid sites were also formed over  $\text{Ag}/\text{MnO}_2\text{-}X$  catalysts, possibly due to weak  $\text{NH}_3$  adsorption over Ag NPs. Recently, acid sites including Brønsted and Lewis sites have been found to participate in the ammonia oxidation reaction, thus improving catalytic activity. Weakly bonded  $\text{NH}_3$  is more active than strongly bonded  $\text{NH}_3$  in the  $\text{NH}_3$  oxidation reaction, and these weak acid



sites that formed after deposition of Ag might therefore have contributed to the increase in the catalytic activity in a low temperature range. Nevertheless, the small increase in weak acid sites cannot fully explain the significant increase in  $\text{NH}_3$  catalytic oxidation activity.

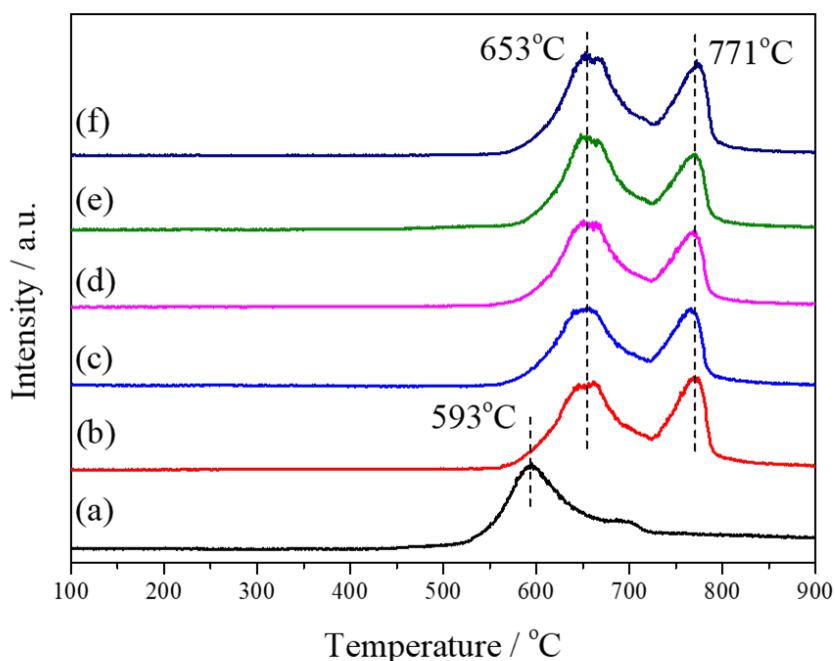

Fig. S8.  $\text{O}_2$ -TPD profiles of  $\text{Ag/MnO}_2\text{-}X$  catalysts: (a)  $\text{MnO}_2$ , (b)  $\text{Ag/MnO}_2\text{-}80$ , (c)  $\text{Ag/MnO}_2\text{-}200$ , (d)  $\text{Ag/MnO}_2\text{-}300$ , (e)  $\text{Ag/MnO}_2\text{-}400$  and (f)  $\text{Ag/MnO}_2\text{-}500$ .

$\text{O}_2$ -TPD measurements were carried out to investigate the  $\text{O}_2$  capacity and desorption property. As shown in Fig. S8, the temperature of  $\text{O}_2$  desorption of  $\text{MnO}_2$  appeared at  $593^\circ\text{C}$ , and the  $\text{O}_2$  desorption peaks shifted to  $653^\circ\text{C}$  and  $771^\circ\text{C}$  after deposition of Ag, indicating that  $\text{O}_2$  adsorption was enhanced by introduction of Ag. Besides, there is no apparent differences in the peak positions of  $\text{Ag/MnO}_2\text{-}X$  catalysts regardless of the calcination temperature, suggesting that  $\text{O}_2$  adsorption and desorption over  $\text{Ag/MnO}_2\text{-}X$  were not the main reason for the increase in  $\text{NH}_3$  catalytic oxidation activity.

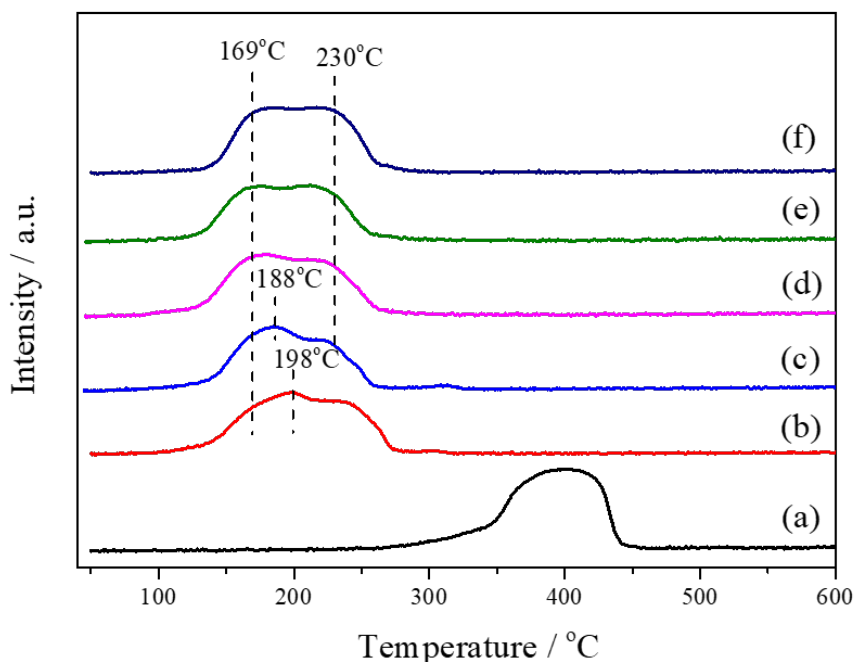

Fig. S9. H<sub>2</sub>-TPR profiles of Ag/MnO<sub>2</sub>-*X* catalysts: (a) MnO<sub>2</sub>, (b) Ag/MnO<sub>2</sub>-80, (c) Ag/MnO<sub>2</sub>-200, (d) Ag/MnO<sub>2</sub>-300, (e) Ag/MnO<sub>2</sub>-400 and (f) Ag/MnO<sub>2</sub>-500.

H<sub>2</sub>-TPR were carried out to obtain information on the reducibility of the Ag-based catalysts, and the results are shown in Fig. S9. The lattice oxygen of MnO<sub>2</sub> is not active in an H<sub>2</sub> atmosphere at  $T < 250$  °C, whereas Ag/MnO<sub>2</sub>-*X* is active for H<sub>2</sub> oxidation at temperatures lower than 200 °C. An apparent increase in reducibility was found after introduction of Ag. It is known that the oxidation activity of Ag is positively associated with reducibility due to the enhanced O<sub>2</sub> activation property over a catalyst surface. Therefore, the increased reducibility can help to explain the improved catalytic activity. However, the large differences in NH<sub>3</sub> conversion and N<sub>2</sub> selectivity cannot be clearly explained by H<sub>2</sub>-TPR measurement.

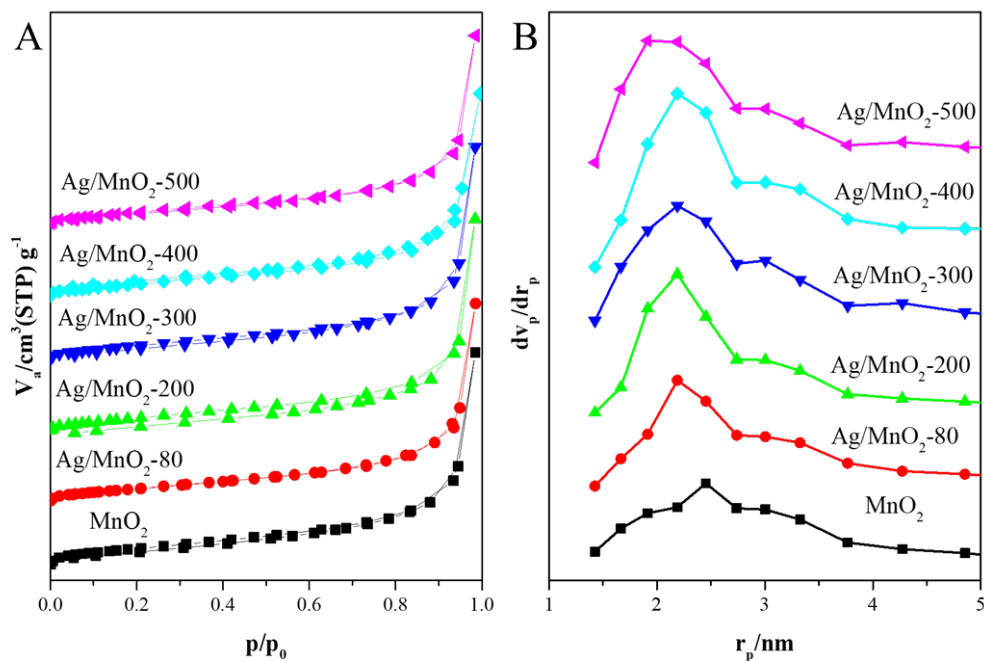

Fig. S10. N<sub>2</sub> adsorption and desorption isotherms (A) and pore size distributions (B) of Ag/MnO<sub>2</sub>-X catalysts.

N<sub>2</sub> adsorption and desorption measurements were next conducted to examine the pore properties of the samples. Fig. S10 shows the N<sub>2</sub> adsorption and desorption isotherms and pore size distributions of Ag/MnO<sub>2</sub>-X catalysts. The isotherms of all of the samples belonged to type II without an obvious hysteresis loop, indicating a nonporous structure. The Barrett–Joyner–Halenda (BJH) pore size distribution curve shows that the average pore size slightly decreased with increase in the calcination temperature, indirectly indicating that the Ag atoms migrated into channel structures of MnO<sub>2</sub>, thus changing the channel structure.

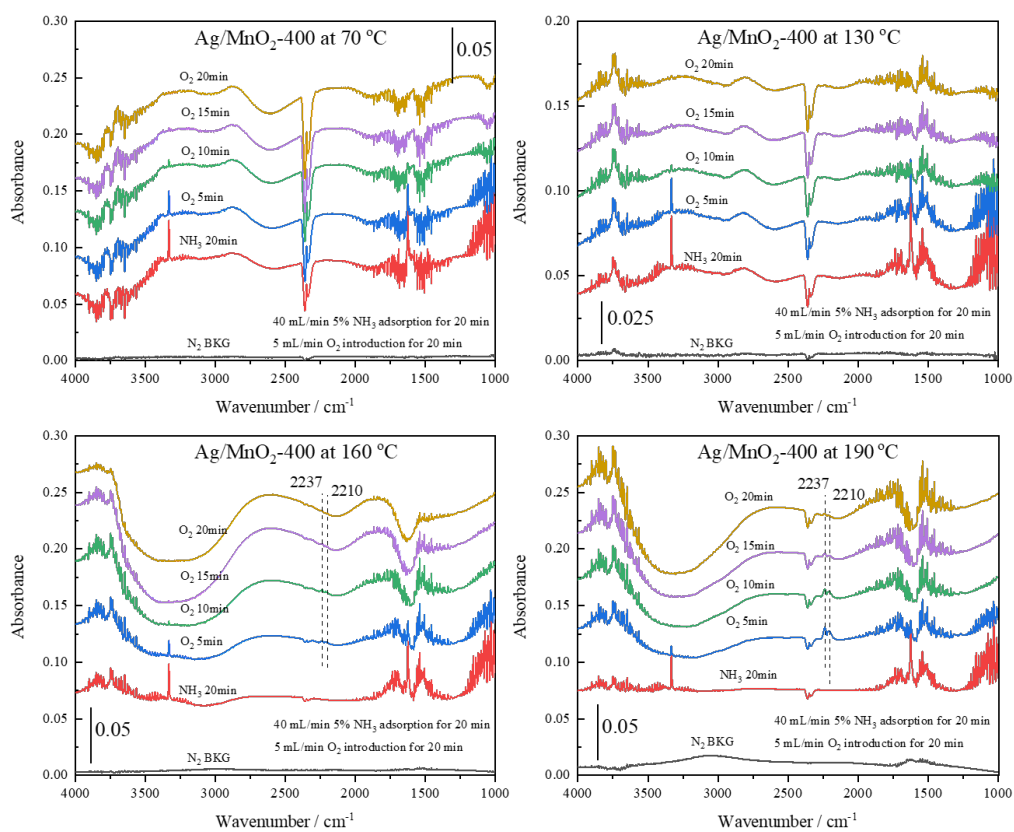

Fig. S11 *In-situ* NH<sub>3</sub> DRIFTS results of Ag/MnO<sub>2</sub>-400 catalyst at various temperatures.

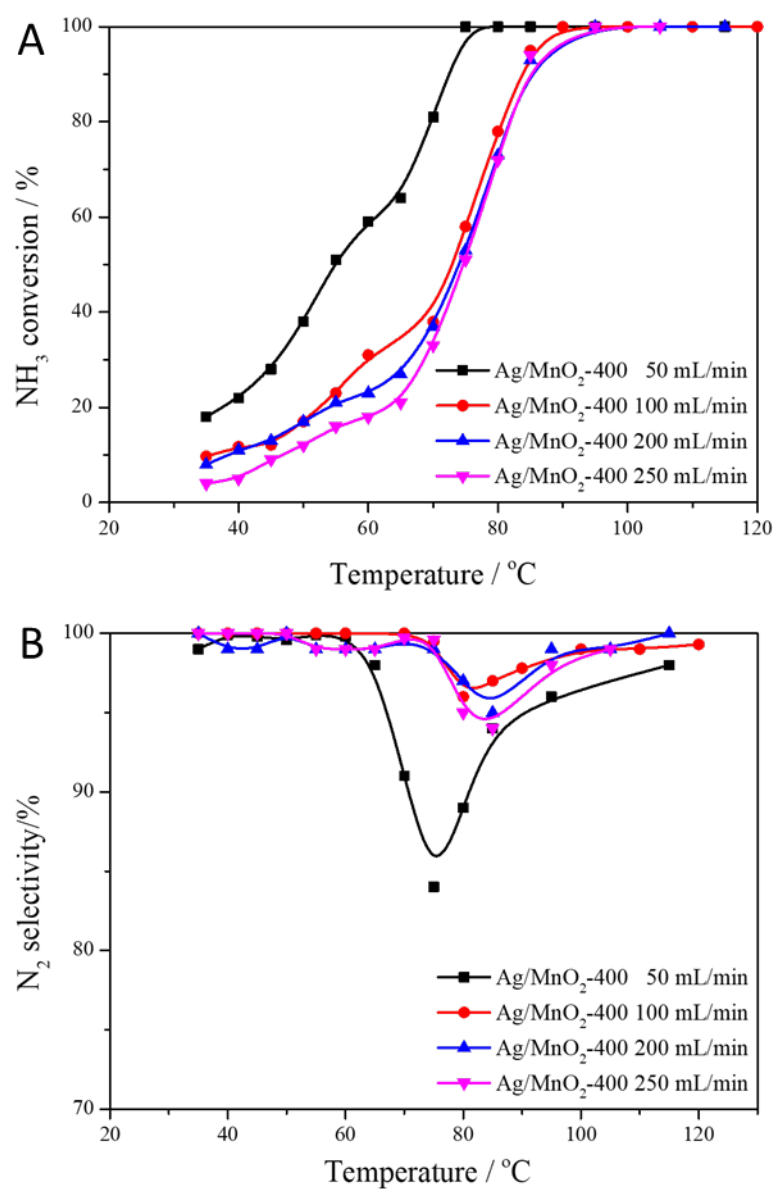

Fig. S12. Catalytic oxidation activity tests over Ag/MnO<sub>2</sub>-400 catalysts with different flow rates.

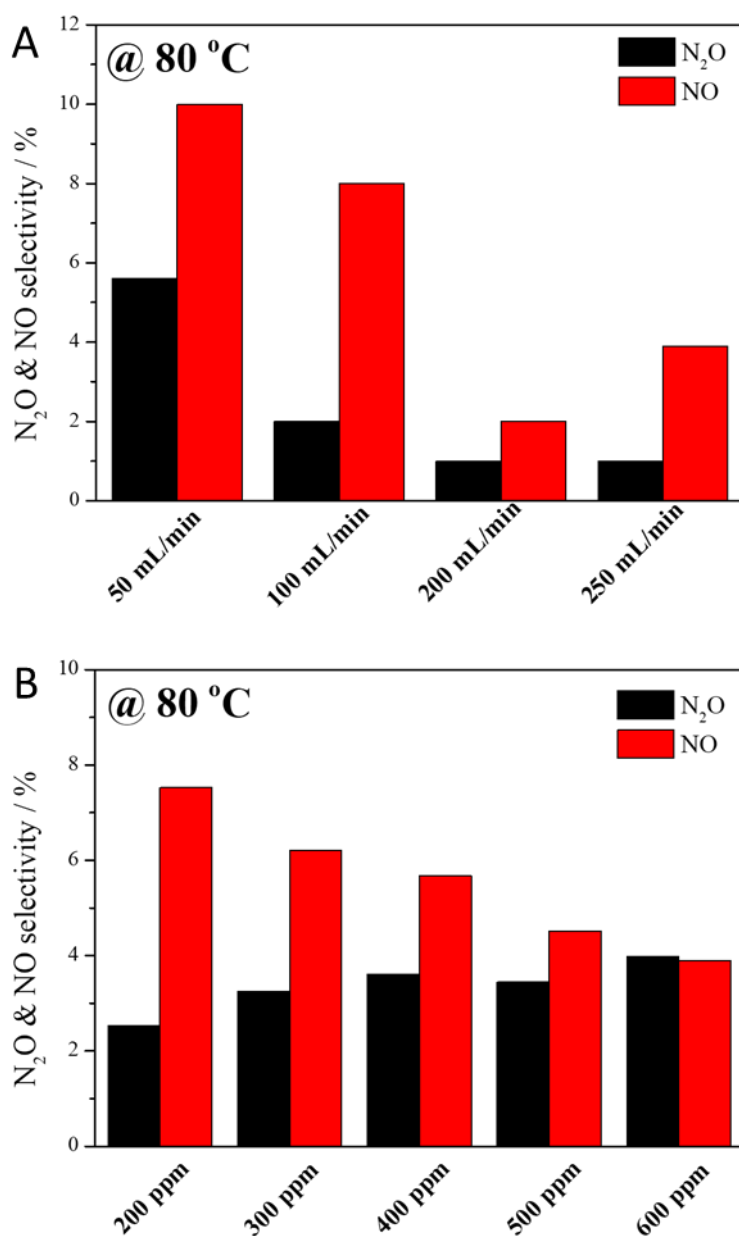

Fig. S13. N<sub>2</sub>O and NO selectivities over Ag/MnO<sub>2</sub>-400 catalysts at 80 °C.

(A) NH<sub>3</sub> concentration of 50 ppm NH<sub>3</sub> (50 mL/min-200 mL/min).

(B) NH<sub>3</sub> concentration of 200-600 ppm NH<sub>3</sub> (100 mL/min).

The effect of flow rate on catalytic performance over Ag/MnO<sub>2</sub>-400 was studied, and the results are shown in Fig. S12. Fig. S13 shows the N<sub>2</sub>O and NO selectivities over Ag/MnO<sub>2</sub>-400 catalysts at 80 °C with different flow rates (A) and different inlet NH<sub>3</sub> concentrations (B). As shown in Fig. S12, the catalytic activity was decreased by

increasing the flow rate from 50 mL/min to 200 mL/min, indicating that the residence time of reactants has an influence on catalytic activity. Interestingly, the selectivity of  $\text{N}_2\text{O}$  and  $\text{NO}$  decreased from 15% to 5%, that is, the  $\text{N}_2$  selectivity was increased from 84% to more than 95% with an increase in the flow rate from 50 mL/min to 200 mL/min (Fig. S13A). This phenomenon suggests that the flow rate has a positive effect on  $\text{N}_2$  selectivity by decreasing the formation of  $\text{NO}$  and  $\text{N}_2\text{O}$  byproducts, possibly because one of the intermediates can react with  $\text{NH}_3$  to form  $\text{N}_2$ . Fig. S13B shows the effect of inlet  $\text{NH}_3$  concentration on  $\text{N}_2$  selectivity over  $\text{Ag/MnO}_2$ -400 catalysts at 80 °C with a total flow rate of 100 mL/min. The results showed that  $\text{N}_2$  selectivity was slightly improved by increasing the inlet  $\text{NH}_3$  concentration from 200 ppm to 600 ppm. A tendency for  $\text{NO}$  selectivity to decrease was also found when the inlet  $\text{NH}_3$  concentration was increased from 200 ppm to 600 ppm.

Table S3. Overview of literature data of catalytic performance related to Ag based catalysts

| Catalyst                                           | Reaction condition                                                                         | Conversion (%)<br>/Temperature (°C) | N <sub>2</sub> selectivity/ (%)/<br>Temperature (°C) | Published<br>year | Ref.          |
|----------------------------------------------------|--------------------------------------------------------------------------------------------|-------------------------------------|------------------------------------------------------|-------------------|---------------|
| Ag powder                                          | [NH <sub>3</sub> ]=1000 ppm, [O <sub>2</sub> ]=10%, Flow rate=50 mL/min, weight=0.1 g      | 100%/200 °C                         | 38%/200 °C                                           | 2001              | <sup>3</sup>  |
| 10 wt% Ag/Al <sub>2</sub> O <sub>3</sub>           | [NH <sub>3</sub> ]=11400 ppm, [O <sub>2</sub> ]=8.21%, Flow rate=74.7 mL/min, weight=0.2 g | 100%/300 °C                         | 83%/300 °C                                           | 2002              | <sup>4</sup>  |
| 7.5wt% Ag-2.5wt% Cu/Al <sub>2</sub> O <sub>3</sub> | [NH <sub>3</sub> ]=1000 ppm, [O <sub>2</sub> ]=10%, Flow rate=50 mL/min, weight=0.1 g      | 100%/~250 °C                        | 95%/~250 °C                                          | 2002              | <sup>4</sup>  |
| 10 wt% Ag/Al <sub>2</sub> O <sub>3</sub>           | [NH <sub>3</sub> ]=1000 ppm, [O <sub>2</sub> ]=10%, Flow rate=50 mL/min, weight=0.1 g      | 100%/~200 °C                        | 83%/~200 °C                                          | 2003              | <sup>5</sup>  |
| 10 wt% Ag/SiO <sub>2</sub>                         | [NH <sub>3</sub> ]=1000 ppm, [O <sub>2</sub> ]=10%, Flow rate=50 mL/min, weight=0.1 g      | 100%/~200 °C                        | 42%/~200 °C                                          | 2003              | <sup>5</sup>  |
| 10wt% Ag/Al <sub>2</sub> O <sub>3</sub>            | [NH <sub>3</sub> ]=10000 ppm, [O <sub>2</sub> ]=10%, Flow rate=400 mL/min, weight=0.8 g    | 100%/~200 °C                        | 82%/~200 °C                                          | 2004              | <sup>6</sup>  |
| 5wt% Ag-5wt% Cu/Al <sub>2</sub> O <sub>3</sub>     | [NH <sub>3</sub> ]=10000 ppm, [O <sub>2</sub> ]=10%, Flow rate=400 mL/min, weight=0.8 g    | 100%/~330 °C                        | 95%/~330 °C                                          | 2004              | <sup>6</sup>  |
| 10wt% Ag/Al <sub>2</sub> O <sub>3</sub>            | [NH <sub>3</sub> ]=500 ppm, [O <sub>2</sub> ]=10%, Flow rate=200 mL/min, weight=0.2 g      | 100%/~150 °C                        | 35%/~150 °C                                          | 2009              | <sup>7</sup>  |
| Ag0.1Ce0.1/Al <sub>2</sub> O <sub>3</sub>          | [NH <sub>3</sub> ]=500 ppm, [O <sub>2</sub> ]=10%, Flow rate=200 mL/min, weight=0.2 g      | 100%/160 °C                         | 50%/160 °C                                           | 2011              | <sup>8</sup>  |
| Ag-Cu/WMH                                          | [NH <sub>3</sub> ]=1000 ppm, [O <sub>2</sub> ]=10%, GHSV=2250 h <sup>-1</sup>              | 100%/230 °C                         | 86%/230 °C                                           | 2013              | <sup>9</sup>  |
| 10wt% Ag/Al <sub>2</sub> O <sub>3</sub>            | [NH <sub>3</sub> ]=1000 ppm, [O <sub>2</sub> ]=10%, Flow rate=400 mL/min, weight=0.4 g     | 100%/200 °C                         | 85%/200 °C                                           | 2014              | <sup>10</sup> |



|                                                   |                                                                                                      |                         |                         |           |    |
|---------------------------------------------------|------------------------------------------------------------------------------------------------------|-------------------------|-------------------------|-----------|----|
| Ag/USY                                            | [NH <sub>3</sub> ]=5000 ppm, [O <sub>2</sub> ]=2.5%, Flow rate=40 mL/min, SV=15400 h <sup>-1</sup>   | 100%/200 °C             | 94%/200 °C              | 2016      | 11 |
| Ag/meso-TiO <sub>2</sub>                          | [NH <sub>3</sub> ]=5000 ppm, [O <sub>2</sub> ]=2.5%, Flow rate=40 mL/min, weight=0.1 g               | 100%/350 °C             | 86%/350 °C              | 2017      | 12 |
| 1.5wt%Ag-10wt%Cu/Al <sub>2</sub> O <sub>3</sub>   | [NH <sub>3</sub> ]=5000 ppm, [O <sub>2</sub> ]=2.5%, Flow rate=40 mL/min, weight=0.1 g               | 100%/375 °C             | 94%/375 °C              | 2018      | 13 |
| Ag/SiO <sub>2</sub> -TiO <sub>2</sub>             | [NH <sub>3</sub> ]=500 ppm, [O <sub>2</sub> ]=10%, Flow rate=100 mL/min, GHSV=28000 h <sup>-1</sup>  | 100%/200 °C             | 63%/200 °C              | 2018      | 14 |
| Ag/nano-Al <sub>2</sub> O <sub>3</sub>            | [NH <sub>3</sub> ]=500 ppm, [O <sub>2</sub> ]=10%, Flow rate=100 mL/min, GHSV=28000 h <sup>-1</sup>  | 100%/140 °C             | 71%/140 °C              | 2018      | 15 |
| Ag/Al <sub>2</sub> O <sub>3</sub> -H <sub>2</sub> | [NH <sub>3</sub> ]=500 ppm, [O <sub>2</sub> ]=10%, Flow rate=100 mL/min, GHSV=28000h <sup>-1</sup>   | 100%/180 °C             | 83%/180 °C              | 2019      | 16 |
| Ag/ZSM-5                                          | [NH <sub>3</sub> ]=1000 ppm, [O <sub>2</sub> ]=10%, Flow rate=100 mL/min, GHSV=35000 h <sup>-1</sup> | 100%/135 °C             | 75%/135 °C              | 2019      | 17 |
| Ag <sub>2</sub> Cu <sub>1</sub> alloy             | [NH <sub>3</sub> ]=1000 ppm, [O <sub>2</sub> ]=10%, Flow rate=100 mL/min, GHSV=12000 h <sup>-1</sup> | 100%/135 °C             | 75%/135 °C              | 2019      | 17 |
| Ag/MnO <sub>2</sub> -300                          | [NH <sub>3</sub> ]=50 ppm, [O <sub>2</sub> ]=20%, Flow rate=100 mL/min, weight=0.15 g                | 15%/35 °C<br>100%/75 °C | 62%/75 °C               | This work |    |
| Ag/MnO <sub>2</sub> -400                          | [NH <sub>3</sub> ]=50 ppm, [O <sub>2</sub> ]=20%, Flow rate=100 mL/min, weight=0.15 g                | 10%/35 °C<br>100%/90 °C | 96%/90 °C<br>99%/100 °C | This work |    |

Table S4. Results for calculations of surface number and density of Ag NPs

| Catalysts                | Weight/g | Surface Ag<br>(wt%) <sup>a</sup> | Ag loadings<br>(wt%) <sup>b</sup> | Surface<br>Ag/ $\mu\text{mol}$ | Size of Ag<br>NPs / nm <sup>c</sup> | Number of Ag<br>atoms in Ag NPs <sup>d</sup> | Number of Ag<br>NPs <sup>d</sup> | Density of Ag<br>particles / N nm <sup>-2</sup> |
|--------------------------|----------|----------------------------------|-----------------------------------|--------------------------------|-------------------------------------|----------------------------------------------|----------------------------------|-------------------------------------------------|
| Ag/MnO <sub>2</sub> -80  | 0.15     | 7.3                              | 7.3                               | 1015                           | 5.1                                 | 2152                                         | 2.84E+17                         | 0.047                                           |
| Ag/MnO <sub>2</sub> -200 | 0.15     | 6.5                              | 7.3                               | 899                            | 4.0                                 | 1395                                         | 3.90E+17                         | 0.060                                           |
| Ag/MnO <sub>2</sub> -300 | 0.15     | 4.7                              | 7.3                               | 651                            | 3.3                                 | 708                                          | 4.75E+17                         | 0.086                                           |
| Ag/MnO <sub>2</sub> -400 | 0.15     | 4.0                              | 7.3                               | 553                            | 2.4                                 | 368                                          | 4.48E+17                         | 0.140                                           |

<sup>a</sup> Determined by atomic absorption spectra (AAS). 0.5 mol/L HNO<sub>3</sub> was used to dissolve the surface Ag.

<sup>b</sup> They were calcined from the same precursor of Ag/MnO<sub>2</sub>-80.

<sup>c</sup> Determined by TEM.

<sup>d</sup> Calculated on the basis of a truncated octahedral model structure reported in reference.<sup>18</sup>

Table S5. Physicochemical properties of Ag/MnO<sub>2</sub>-*X* catalysts

| Catalysts                | Acidity<br>(mmol/g) <sup>a</sup> | H <sub>2</sub> takes<br>(mmol/g) <sup>b</sup> | O <sub>2</sub> -TPD<br>(mmol/g) | S <sub>BET</sub><br>(m <sup>2</sup> /g) |
|--------------------------|----------------------------------|-----------------------------------------------|---------------------------------|-----------------------------------------|
| Ag/MnO <sub>2</sub> -80  | 0.31                             | 6.87                                          | 1.37                            | 40                                      |
| Ag/MnO <sub>2</sub> -200 | 0.29                             | 7.60                                          | 1.43                            | 43                                      |
| Ag/MnO <sub>2</sub> -300 | 0.27                             | 7.84                                          | 1.47                            | 43                                      |
| Ag/MnO <sub>2</sub> -400 | 0.30                             | 7.34                                          | 1.53                            | 42                                      |
| Ag/MnO <sub>2</sub> -500 | 0.27                             | 7.17                                          | 1.49                            | 40                                      |
| MnO <sub>2</sub>         | 0.36                             | 7.94                                          | 0.89                            | 48                                      |

a: Determined by NH<sub>3</sub>-TPD

b: Determined by H<sub>2</sub>-TPR

## 2.2. Supplementary catalytic reaction and characterization of Ag/MnO<sub>2</sub> with different Ag loadings

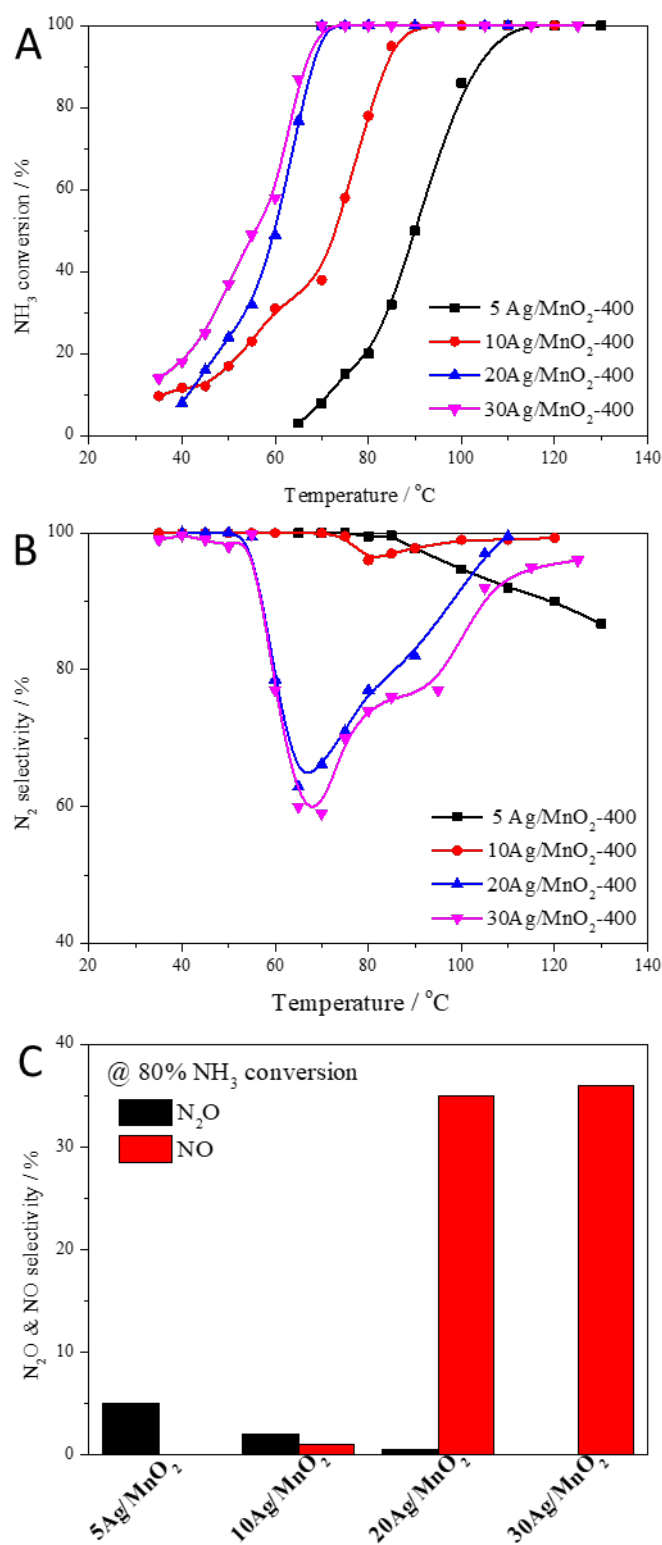

Fig. S14. NH<sub>3</sub>-SCO catalytic performance over yAg/MnO<sub>2</sub>-400 catalysts: (A) NH<sub>3</sub> conversion results, (B) N<sub>2</sub> selectivity results, and (C) NO and N<sub>2</sub>O selectivity results.

NH<sub>3</sub>-SCO catalytic reactions over  $\gamma$ Ag/MnO<sub>2</sub>-400 catalyst with different Ag loadings were carried out. As shown in Fig. S14A, it was found that 5Ag/MnO<sub>2</sub>-400 has a low catalytic activity, reaching 100% NH<sub>3</sub> conversion at 110 °C. The catalytic activity was increased by increasing Ag loadings from 5% to 30%. 30Ag/MnO<sub>2</sub>-400 showed the highest catalytic activity among the Ag/MnO<sub>2</sub> catalysts with distinct loadings, with almost 20% NH<sub>3</sub> conversion at 40 °C and 100% NH<sub>3</sub> conversion at 70 °C.

On the other hand, a similar changing tendency of N<sub>2</sub> selectivity as well as NO and N<sub>2</sub>O selectivity with Ag/MnO<sub>2</sub>-*X* catalysts was found over  $\gamma$ Ag/MnO<sub>2</sub>-400 catalysts. That is, N<sub>2</sub> selectivity first decreased and then increased with increasing temperature. With increase in Ag loading, N<sub>2</sub>O selectivity decreased, but NO selectivity increased. As can be seen in Fig. S15, larger Ag NPs were formed with higher Ag loadings. The results strongly suggest that Ag size/structure plays a crucial role in the regulation of N<sub>2</sub> selectivity and type of byproduct.

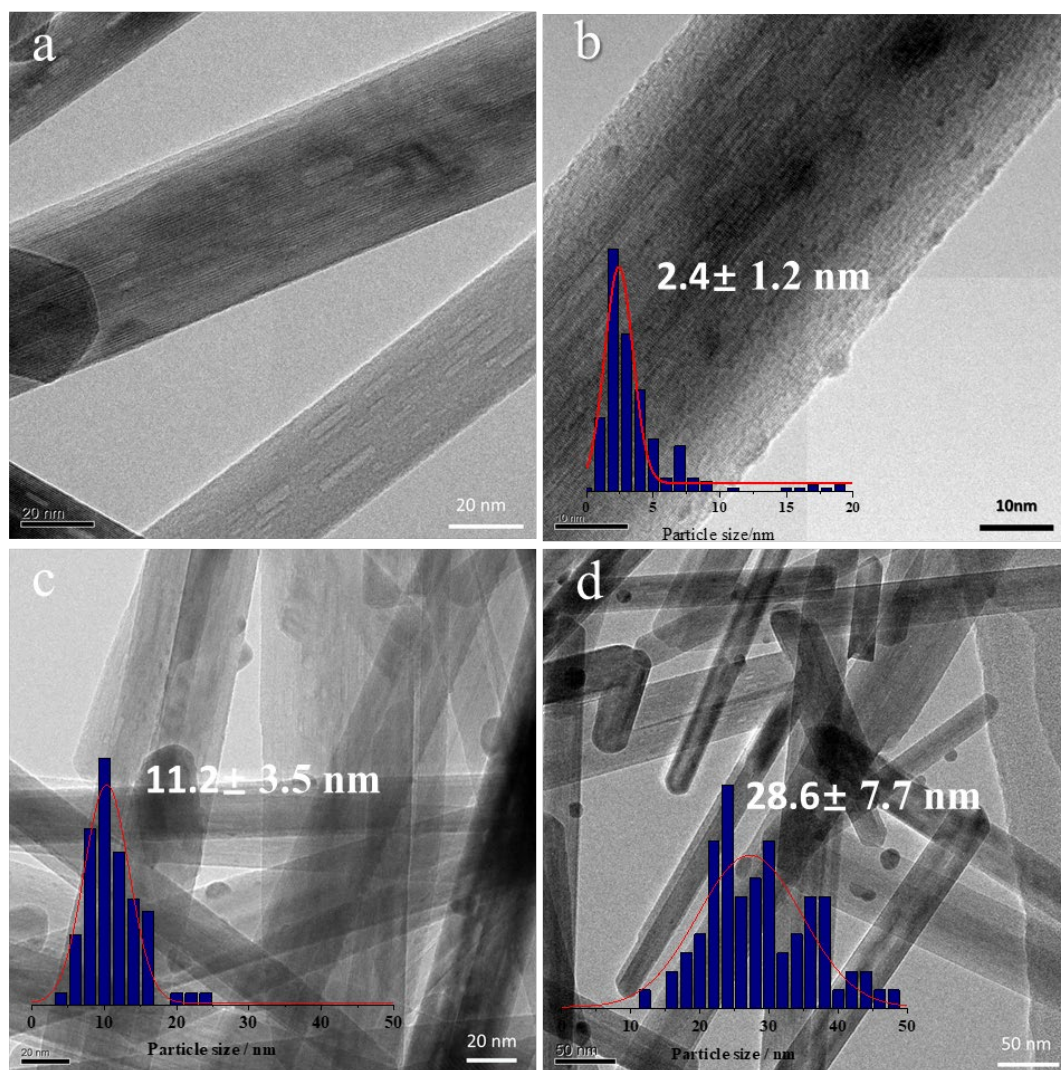

Fig. S15. TEM images of  $\gamma$ Ag/MnO<sub>2</sub>-400 catalysts: (a) 5Ag/MnO<sub>2</sub>-400, (b) 10Ag/MnO<sub>2</sub>-400, (c) 20Ag/MnO<sub>2</sub>-400, and (d) 30Ag/MnO<sub>2</sub>-400.

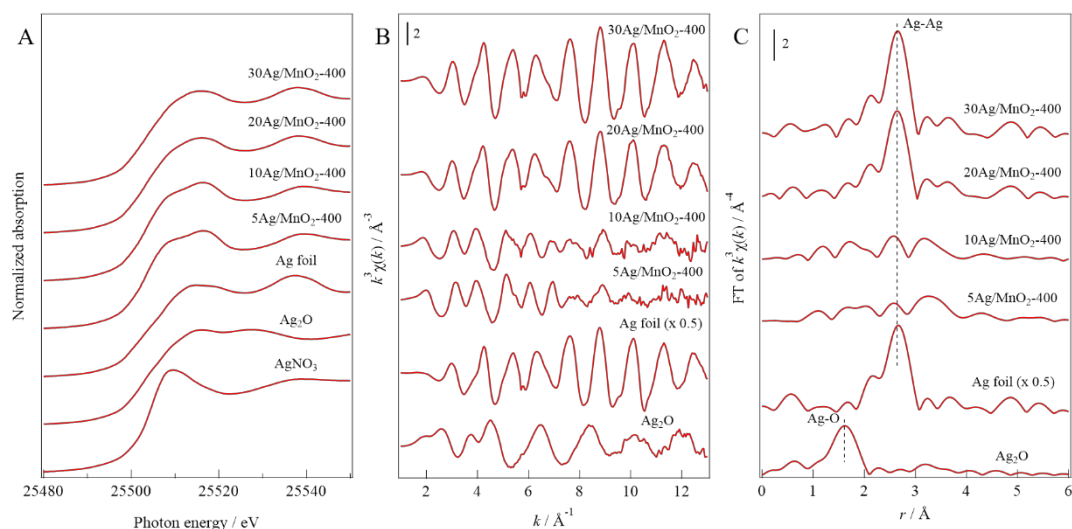

Fig. S16. Ag K-edge XANES spectra (A),  $k^3$ -weighted EXAFS oscillation (B), and their Fourier transforms (C) of yAg/MnO<sub>2</sub>-400 catalysts and references.

Fig. S16 shows Ag K-edge XANES spectra,  $k^3$ -weighted EXAFS oscillation and their Fourier transforms of yAg/MnO<sub>2</sub>-400 catalysts and references. The spectral shape of Ag K-edge XANES spectra of yAg/MnO<sub>2</sub>-400 catalysts, which was close to that of Ag foil, suggested that Ag species in yAg/MnO<sub>2</sub>-400 catalysts were present as metallic state. The white-line intensities of yAg/MnO<sub>2</sub>-400 catalysts appeared at 25530 eV, which is slightly higher than that for Ag foil and the height of the white-line gradually decreased with an increase in the Ag loading (Fig. S17). The high intensity of the white-line of yAg/MnO<sub>2</sub>-400 suggests the presence of electron-deficient Ag metal NPs.

Fig. S16B and S16C and Table S6 show the EXAFS spectra, their FTs and structural parameters determined by the EXAFS fitting, respectively. In the FTs of the EXAFS spectra of yAg/MnO<sub>2</sub>-400 catalysts, the Ag-Ag scattering peak was observed at around 2.7 Å and the height of the Ag-Ag peak shown in Fig. S16C increased with increase in the Ag loading amount. The coordination number of Ag-Ag increased with an increase in the Ag loading amount. Therefore, larger Ag NPs are considered to be formed at larger Ag loading amounts (< 20 wt%).

Table S6. Structural parameters of yAg/MnO<sub>2</sub>-400<sup>a</sup>

|                            | CN <sup>b</sup> | $r^c / \text{\AA}$ | $\sigma^2^d / \text{\AA}^2$ | $\Delta E_0^e / \text{eV}$ | $R^f$ |
|----------------------------|-----------------|--------------------|-----------------------------|----------------------------|-------|
| 5Ag/MnO <sub>2</sub> -400  | 1.800           | 2.804              | 0.018                       | -11.2                      | 0.35  |
| 10Ag/MnO <sub>2</sub> -400 | 3.057           | 2.796              | 0.018                       | -10.7                      | 0.35  |
| 20Ag/MnO <sub>2</sub> -400 | 5.233           | 2.849              | 0.012                       | -2.9                       | 0.05  |
| 30Ag/MnO <sub>2</sub> -400 | 6.318           | 2.851              | 0.011                       | -1.2                       | 0.06  |
| Ag foil                    | 12 <sup>g</sup> | 2.860              | 0.011                       | -0.2                       | 0.11  |

a Curve fitting analyses of the FTs of EXAFS were performed in R-space between 2.0 and 3.2  $\text{\AA}$ , and  $k$ -space between 3.0 and 12.0  $\text{\AA}^{-1}$

b Coordination number.

c Distance of Ag–Ag.

d Debye–Waller factor.

e Edge-energy shift.

f  $R$  factor.

g Fixed.

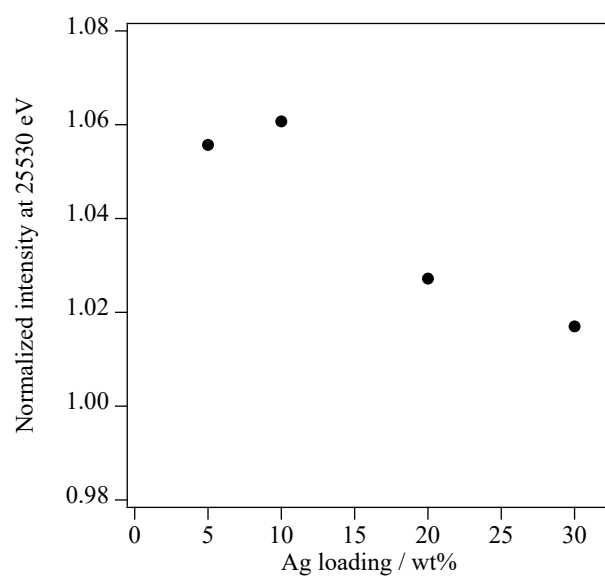

Fig. S17. White-line intensity of Ag K-edge XANES spectra of yAg/MnO<sub>2</sub>-400 catalysts at 25530 eV. For Ag foil, the intensity is 0.98566.



### 3. Supplementary References

1. M.A. Vannice, Kinetics of Catalytic Reactions, in, Springer Science+Business Media, Inc., 2005.
2. B.E. Poling, J. O'Connell, J.M. Prausnitz, The Properties of Gases and Liquids, 5th ed., McGraw-Hill Professional Publishing, New York, NY, USA, 2001.
3. Gang, L.; Anderson, B.; Van Grondelle, J.; Van Santen, R., Intermediate species and reaction pathways for the oxidation of ammonia on powdered catalysts. *J. Catal.*, **2001**, 199 (1), 107-114.
4. Gang, L.; Anderson, B.; Van Grondelle, J.; Van Santen, R.; Van Gennip, W.; Niemantsverdriet, J.; Kooyman, P.; Knoester, A.; Brongersma, H., Alumina-supported Cu–Ag catalysts for ammonia oxidation to nitrogen at low temperature. *J. Catal.*, **2002**, 206 (1), 60-70.
5. Gang, L.; Anderson, B. G.; van Grondelle, J.; van Santen, R. A., Low temperature selective oxidation of ammonia to nitrogen on silver-based catalysts. *Appl. Catal. B-Environ.*, **2003**, 40 (2), 101-110.
6. Yang, M.; Wu, C.; Zhang, C.; He, H., Selective oxidation of ammonia over copper-silver-based catalysts. *Catal. Today*, **2004**, 90 (3-4), 263-267.
7. Zhang, L.; He, H., Mechanism of selective catalytic oxidation of ammonia to nitrogen over Ag/Al<sub>2</sub>O<sub>3</sub>. *J. Catal.*, **2009**, 268 (1), 18-25.
8. Zhang, L.; Liu, F.; Yu, Y.; Liu, Y.; Zhang, C.; He, H., Effects of adding CeO<sub>2</sub> to Ag/Al<sub>2</sub>O<sub>3</sub> catalyst for ammonia oxidation at low temperatures. *Chinese J. Catal.*, **2011**, 32 (5), 727-735.
9. Qu, Z.; Wang, Z.; Quan, X.; Wang, H.; Shu, Y., Selective catalytic oxidation of ammonia to N<sub>2</sub> over wire-mesh honeycomb catalyst in simulated synthetic ammonia stream. *Chem. Eng. J.*, **2013**, 233, 233-241.
10. Qu, Z.; Wang, H.; Wang, S.; Cheng, H.; Qin, Y.; Wang, Z., Role of the support on the behavior of Ag-based catalysts for NH<sub>3</sub> selective catalytic oxidation (NH<sub>3</sub>-SCO). *Appl. Surf. Sci.*, **2014**, 316, 373-379.
11. Góra-Marek, K.; Tarach, K. A.; Piwowarska, Z.; Łaniecki, M.; Chmielarz, L., Ag-loaded zeolites Y and USY as catalysts for selective ammonia oxidation. *Catal. Sci. Tech.*, **2016**, 6 (6), 1651-1660.
12. Jabłońska, M.; Ciptonugroho, W.; Góra-Marek, K.; Al-Shaal, M. G.; Palkovits, R., Preparation, characterization and catalytic performance of Ag-modified mesoporous TiO<sub>2</sub> in low-temperature selective ammonia oxidation into nitrogen and water vapour. *Microporous Mesoporous Mater.*, **2017**, 245, 31-44.
13. Jabłońska, M.; Beale, A. M.; Nocuń, M.; Palkovits, R., Ag-Cu based catalysts for the selective ammonia oxidation into nitrogen and water vapour. *Appl. Catal. B*, **2018**, 232, 275-287.
14. Wang, F.; Ma, J.; He, G.; Chen, M.; Wang, S.; Zhang, C.; He, H., Synergistic Effect of TiO<sub>2</sub>-SiO<sub>2</sub> in Ag/Si-Ti catalyst for the selective catalytic oxidation of ammonia. *Ind. Eng. Chem. Res.*, **2018**, 57 (35), 11903-11910.
15. Wang, F.; Ma, J. Z.; He, G. Z.; Chen, M.; Zhang, C. B.; He, H., Nanosize Effect of Al<sub>2</sub>O<sub>3</sub> in Ag/Al<sub>2</sub>O<sub>3</sub> catalyst for the selective catalytic oxidation of ammonia. *ACS Catal.*, **2018**, 8 (4), 2670-2682.
16. Wang, F.; He, G.; Zhang, B.; Chen, M.; Chen, X.; Zhang, C.; He, H., Insights into the activation effect of H<sub>2</sub> pretreatment on Ag/Al<sub>2</sub>O<sub>3</sub> catalyst for the selective oxidation of ammonia. *ACS Catal.*, **2019**, 9 (2), 1437-1445.
17. Wang, Z.; Sun, Q.; Wang, D.; Hong, Z.; Qu, Z.; Li, X., Hollow ZSM-5 zeolite encapsulated Ag nanoparticles for SO<sub>2</sub>-resistant selective catalytic oxidation of

ammonia to nitrogen. *Sep. Purif. Technol.*, **2019**, *209*, 1016-1026.

18. Carlsson, A.; Puig-Molina, A.; Janssens, T. V., New method for analysis of nanoparticle geometry in supported fcc metal catalysts with scanning transmission electron microscopy. *J. Phys. Chem. B*, **2006**, *110* (11), 5286-5293.
